# Supplementary material for: Adolescents’ Experiences of Close Relatives Having Physical Illness, Mental Illness, Addiction/Gambling Disorders, or Death Are Associated with Poor Mental Health and Non-Suicidal Self-Injury
Source: MDPI journal article supplement (doi:10.3390/psychiatryint4040034), 2023-11-15
Supplement: s1 [file s1]

**Supplementary Table S1.** Original variables, response options, categorizations and variable names used in the manuscript.

| Original variable                                                                                                                           | Response options                                                                                                                                                                                                                                            | Recoded into  | Variable used in manuscript                      |
|---------------------------------------------------------------------------------------------------------------------------------------------|-------------------------------------------------------------------------------------------------------------------------------------------------------------------------------------------------------------------------------------------------------------|---------------|--------------------------------------------------|
| During the last 6 months, have you been bullied at school?                                                                                  | Yes, a few times; yes, a few times a month; yes, a few times a week; or yes, basically every day<br><br>No                                                                                                                                                  | Yes<br><br>No | Not being bullied at school <sup>§</sup>         |
| Do you like school?                                                                                                                         | Very much, much<br><br>Neither/nor, not that much, or not at all                                                                                                                                                                                            | Yes<br><br>No | Enjoying school                                  |
| Do you feel safe at home?                                                                                                                   | Yes, always<br><br>Yes, often or no, seldom or never                                                                                                                                                                                                        | Yes<br><br>No | Feeling safe at home                             |
| Whom do you live with?                                                                                                                      | Living with both of my parents who live together<br><br>Living with my mother, living with my father, living with my mother and her partner, living with my father and his partner, living in a family home, living with another caregiver, or I live alone | Yes<br><br>No | Living with both parents                         |
| Have you been exposed to any harassments or violations on social media, such as Snapchat, Instagram, or Facebook during the last 12 months? | Yes, once; yes, several times; or yes, about once a week<br><br>No, or I have never used social media                                                                                                                                                       | Yes<br><br>No | Not being violated via social media <sup>§</sup> |
| How do you like your life right now?                                                                                                        | I'm very happy or I'm quite happy<br><br>I'm not that happy or I'm unhappy                                                                                                                                                                                  | Yes<br><br>No | Feeling happy about life                         |
| How do you like your leisure time                                                                                                           | I'm very happy or I'm quite happy<br><br>I'm not that happy or I'm unhappy                                                                                                                                                                                  | Yes<br><br>No | Feeling happy with leisure                       |
| How often do you eat dinner?                                                                                                                | Every day<br><br>4–6 times a week, 1–3 times a week, or never                                                                                                                                                                                               | Yes<br><br>No | Having dinner every daily                        |
| During the past 3 months, how often have you had difficulties falling asleep?                                                               | Seldom or never<br><br>Once a month, once a week, more than once a week, and almost every day                                                                                                                                                               | No<br><br>Yes | Falling asleep well <sup>§</sup>                 |
| During the past 3 months, how often have you had restless sleep?                                                                            | Seldom or never<br><br>Once a month, once a week, more than once a week, or almost every day                                                                                                                                                                | No<br><br>Yes | Getting good sleep <sup>§</sup>                  |
| Have you consumed alcohol during the last 12 months?                                                                                        | Yes, one time up to yes, more than two times a week<br><br>No                                                                                                                                                                                               | Yes<br><br>No | No use of alcohol <sup>§</sup>                   |

<sup>§</sup> Recoded to reflect a protective role.
